# Supplementary material
Source: PubMed Central journal article supplement (PMC3091221)
Supplement: supp_M110.199166_jbc.M110.199166-2.pdf [file supp_M110.199166_jbc.M110.199166-2.pdf]

[ Amino Acid Sequence Homology Data between Msi1 & Msi2 ]

1st Amino Acid Sequence; m-Msi1 (363 aa)

2nd Amino Acid Sequence; m-Msi2 (346 aa)

Analyzed by Genetyx 7

[67.131% / 359 aa]

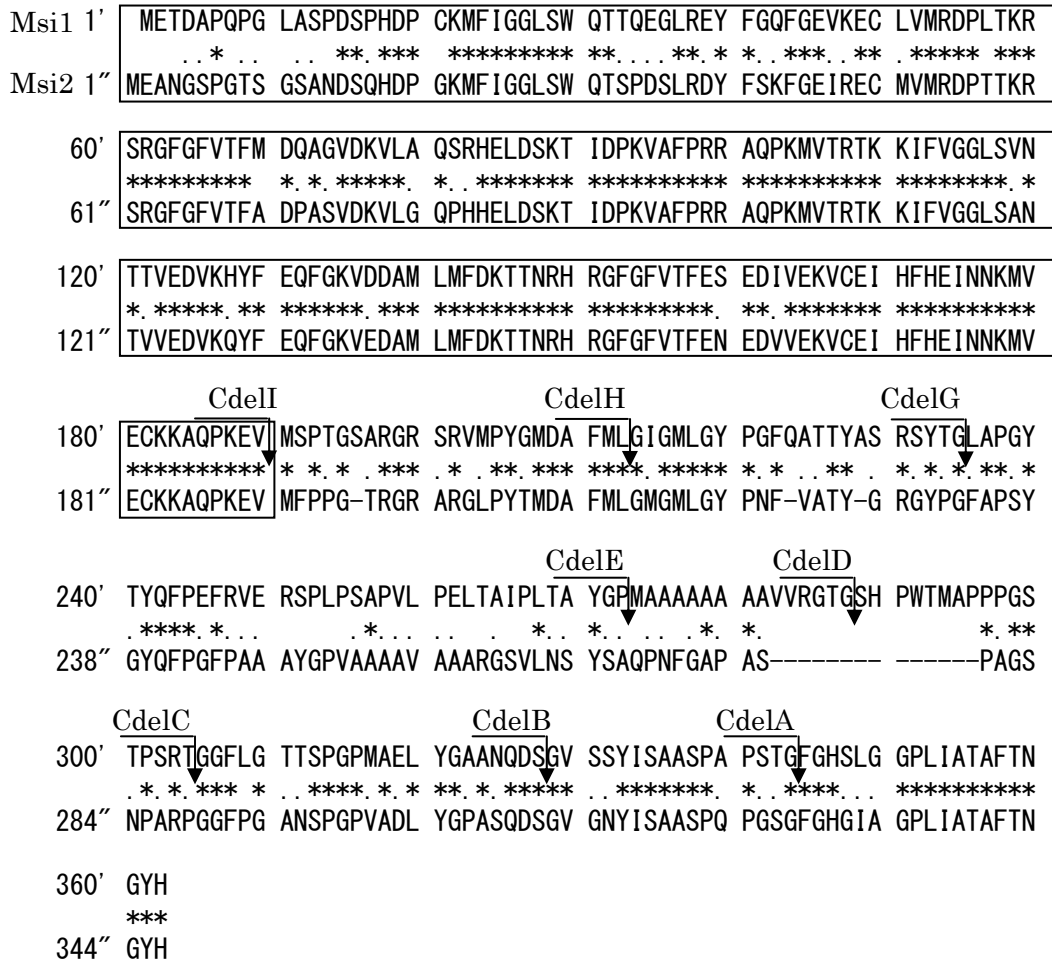

Supplemental FigS 2.

Msi1 and Msi2 amino acid sequence alignments. The rectangle indicates the N-terminal domain including RRM, which is highly conserved between Msi1 and Msi2. Cdel indicates each Msi1 C-terminal deletion, and lines with arrows indicate the position of deletion in Msi1.
