# Supplementary material
Source: PubMed Central journal article supplement (PMC3091221)
Supplement: supp_M110.199166_jbc.M110.199166-3.pdf [file supp_M110.199166_jbc.M110.199166-3.pdf]

**Table S1. Vectors, Northern probes, and qPCR primers used in this study**

| <b>Vector</b>                        | <b>Template/source</b>                    | <b>Primer For and Rev (5'→3' ) // restriction enzyme site</b> |
|--------------------------------------|-------------------------------------------|---------------------------------------------------------------|
| pcDNA3-Flag                          | Imai et al., 2001 <sup>a</sup>            |                                                               |
| pcDNA3-Flag-Msi1                     | Imai et al., 2001 <sup>a</sup>            |                                                               |
| pcDNA3-Flag-Msi2                     | Imai et al., 2001 <sup>a</sup>            |                                                               |
| pcDNA3-Flag-Msi1                     | pcDNA3-Flag-Msi1                          | GATGGTCACTgcGACGgcGgcGATCTTCGTG /                             |
| NLSmutB <sup>b</sup>                 |                                           | CACGAAGATCgcCgcCGTCgcAGTGACCATC //                            |
| pcDNA3-Flag-Msi1                     | pcDNA3-Flag-Msi1NLSmutB                   | GACCCCTGACCgcAgcATCCgcGGGTCTCGGC /                            |
| NLSmutAB <sup>b</sup>                |                                           | GCCGAgACCCgcGGATgcTgcGGTCAGGGGGTC //                          |
| p3xFlag-GST                          | Kawahara et al., 2008 <sup>c</sup>        |                                                               |
| pcDNA3-Flag-Lin28                    |                                           | tctagaATGGGCTCGGTGTCCAACCAGCAGTTTGCAGG /                      |
|                                      |                                           | gaattcTCAATTCTGGGCTTCTGGGAGCAGGGCAGG // <i>XbaI-EcoRI</i>     |
| pcDNA3-Flag-mPasha                   |                                           | tctagaATGGAGACATATGAGAGTCCCTCTCCCTCTCC /                      |
|                                      |                                           | gaattcTCATACATCGACTGTGCACAAGGGCTCAC // <i>XbaI-EcoRI</i>      |
| pcDNA3-mDrosha-Flag <sup>d</sup>     |                                           | ATGCCCCACGGCCAGACTTTGTCCCTTACCCTCCC /                         |
|                                      |                                           | GGATCCCAAAGTGAACGATAATCGGGAAAGTGATCAC //                      |
|                                      |                                           | GGATCCGCCCCGCACAGTTGAGTTATGCAGGAGAC /                         |
|                                      |                                           | CTTCTTGATGTCTTCAGCCTCCTCCGGCTC //                             |
| pEBG-Msi1                            | Kawahara et al., 2008 <sup>c</sup>        |                                                               |
| pGEX6-P                              | GE Healthcare                             |                                                               |
| pGEX6P-hnRNP K                       | Provided by Dr. Yano <sup>e</sup>         |                                                               |
| pGEX-6P-Flag-Msi1                    | pcDNA3-Flag-Msi1                          |                                                               |
| pGEX-6P-myc-Msi2                     | Provided by Dr. Shibata <sup>f</sup>      |                                                               |
| pGEX6P-Lin28                         | pcDNA3-Flag-Lin28                         |                                                               |
| pGEX6P-mKpna1 ( $\alpha$ -5)         | Fig. 5A                                   | ATGTCCACACCAGGAAAAGAGAAGTTCGCCTG /                            |
|                                      |                                           | TCAAAGCTGGAAACCTTCCATAGGAGCTTAC//                             |
| pGEX6P-mKpna4 ( $\alpha$ -3)         | Fig. 5A                                   | ATGGCGGACAACGAGAAATTGGACAACCAACGG/                            |
|                                      |                                           | CTAAACTGGAACCCCTCTGTTGGTACATTGG //                            |
| pGEX6P-mKpna2 ( $\alpha$ -1)         | Fig. 5A                                   | ATGTCCACGAACGAGAATGCTAAGTACCAGC /                             |
|                                      |                                           | TTAGAAGTTAAAGTCCCAGGAGCTCCATCCT //                            |
|                                      | Kaneko                                    |                                                               |
| 3xFLAG hZCCHC11 (hTUT <sup>2</sup> ) | Provided by Prof. Yoshimura <sup>f</sup>  |                                                               |
| pT7-pri-miR98                        |                                           | CCAAAGCCTACATAATATTTTAAAAGCACTGAAGAG /                        |
|                                      |                                           | GCAAGTCATTTAACATTATTTGCCTCACTCTATC //                         |
| pT7-pri-let-7b                       |                                           | CACCTCCCTCCCCACCCCGCCTGTGCCCTATG /                            |
|                                      |                                           | CATCTTTATTTATACCCAGGTCCCACGTCATAGC//                          |
| U6 snRNA                             | Fig. 2C                                   | CACGAATTTGCGTGTATCCTT                                         |
| mmu-miR-98 (39209-00)                | miRCURY LNA <sup>TM</sup> Detection probe | AACAATACAACCTTACTACCTCA                                       |
| mmu-let-7b (39001-00)                | miRCURY LNA <sup>TM</sup> Detection probe | AACCACACAACCTTACTACCTCA                                       |

<sup>a</sup> Imai, T., A. Tokunaga, T. Yoshida, M. Hashimoto, K. Mikoshiba, G. Weinmaster, M. Nakafuku, and H. Okano. 2001. *Mol Cell Biol.* 21:3888-3900.

<sup>b</sup> Site-Directed Mutagenesis was performed as the previous study (Sunabori et al., *J. Cell Sci.* 121: 1204-12); it was based on "QuikChange Site-Directed Mutagenesis Kit" (Stratagene) and used *KOD+* (TOYOBO) and *DpnI* (NEB).

<sup>c</sup> Kawahara, H., T. Imai, M. Tuzimoto, K. Matsumoto, and H. Okano. 2008 *J. Cell Biology* 22:139-153.

<sup>d</sup> Cloning of mDrosha was amplified two-fragments and legated.

<sup>e</sup> Yano, M., H.J. Okano, and H. Okano. 2005. *J Biol Chem.* 280:12690-12699.

<sup>f</sup> Dr. Shibata kindly gift

**Table S2. Buffers used in this study**

| <b>Buffer</b>                       | <b>Composition</b>                                                                                    | <b>Use</b>                                  |
|-------------------------------------|-------------------------------------------------------------------------------------------------------|---------------------------------------------|
| TEV cleavage (TC) <sup>a</sup>      | 10 mM Tris-HCl (pH 8.0), 150 mM NaCl, 0.1% NP-40, 0.5 mM EDTA, and 1 mM DTT                           | Fig. 1B, 1C, 2A, 2B, 2D, 4B, 5A 5B, and S1B |
| Buffer A <sup>b</sup>               | 10mM HEPES at pH 7.9, 10mM KCl, 1mM DTT and 0.1mM EDTA, and Complete Protease Inhibitor Cocktail-EDTA | Fig. 1A, 4E, and S1A                        |
| Buffer D <sup>b</sup>               | 20mM Tris-HCl at pH 8.0, 100mM KCl, 0.2mM EDTA and Protease Inhibitor cocktail EDTA-complete          | Fig. 1A, 4E, and S1A                        |
| Hybridization solution <sup>a</sup> | 0.2 M Phosphate Buffer pH7.2, 7% SDS, and 1mM EDTA                                                    | Fig. 2A, 2D                                 |
| Lysis buffer <sup>c</sup>           | 20 mM Tris-HCl (pH 8.0), 100 mM KCl, and 0.2 mM EDTA                                                  | Fig. 3A to 3C                               |
| RNA elution buffer <sup>c</sup>     | 0.3 M sodium acetate, pH 5.5 and 2% SDS                                                               | Fig. 3A to 3C                               |

<sup>a</sup>Kawahara, H., T. Imai, M. Tuzimoto, K. Matsumoto, and H. Okano. 2008 *J. Cell Biology* 22, 139-153.

<sup>b</sup>Heo, I., Joo, C., Cho, J., Ha, M., Han, J., and Kim, V.N. 2008. *Mol. Cell* 32, 276-284.

<sup>c</sup>Lee, Y., and Kim, V.N.. 2007. *Methods Enzymol* 427, 89-106.

**Table S3. Antibodies used in this study**

| <b>Antibody</b>   | <b>Animal species</b>              | <b>Identity/source</b>               |
|-------------------|------------------------------------|--------------------------------------|
| Msi1 (14H1)       | Rat monoclonal antibody 14H1       | Kaneko et al., 2000 <sup>a</sup>     |
| Lin28             | Goat polyclonal antibody           | R&D Systems, Inc.                    |
| Hu-R              | Mouse monoclonal antibody 3A2      | Santa Cruz Biotechnology, Inc.       |
| Msi2              | Rabbit polyclonal antibody         | Sakakibara et al., 2001 <sup>b</sup> |
| Nanog             | Rabbit polyclonal antibody         | ReproCELL Inc.                       |
| $\beta$ -tubulin  | Mouse monoclonal antibody SDL3D10  | Sigma-Aldrich                        |
| $\alpha$ -tubulin | Mouse monoclonal antibody DM-1A    | Sigma-Aldrich                        |
| $\beta$ -Actin    | Mouse monoclonal antibody AC-15    | Sigma-Aldrich                        |
| Flag              | Mouse monoclonal antibody M2       | Sigma-Aldrich                        |
| GST               | Rabbit polyclonal antibody (G7781) | Sigma-Aldrich                        |

<sup>a</sup>Kaneko, Y., S. Sakakibara, T. Imai, A. Suzuki, Y. Nakamura, K. Sawamoto, Y. Ogawa, Y. Toyama, T. Miyata, and H. Okano. 2000. *Dev Neurosci*. 22:139-153.

<sup>b</sup>Sakakibara, S., Nakamura, Y., Satoh, H., and Okano, H. 2001 *J Neurosci* 21, 8091-8107.
